# Supplementary material for: The Pseudomonas aeruginosa Lectin LecB Causes Integrin Internalization and Inhibits Epithelial Wound Healing
Source: PubMed Central journal article supplement (PMC7064779; doi:10.1128/mbio.03260-19), 2020-03-10
Supplement: mBio.03260-19-sf003.pdf [file mBio.03260-19-sf003.pdf]

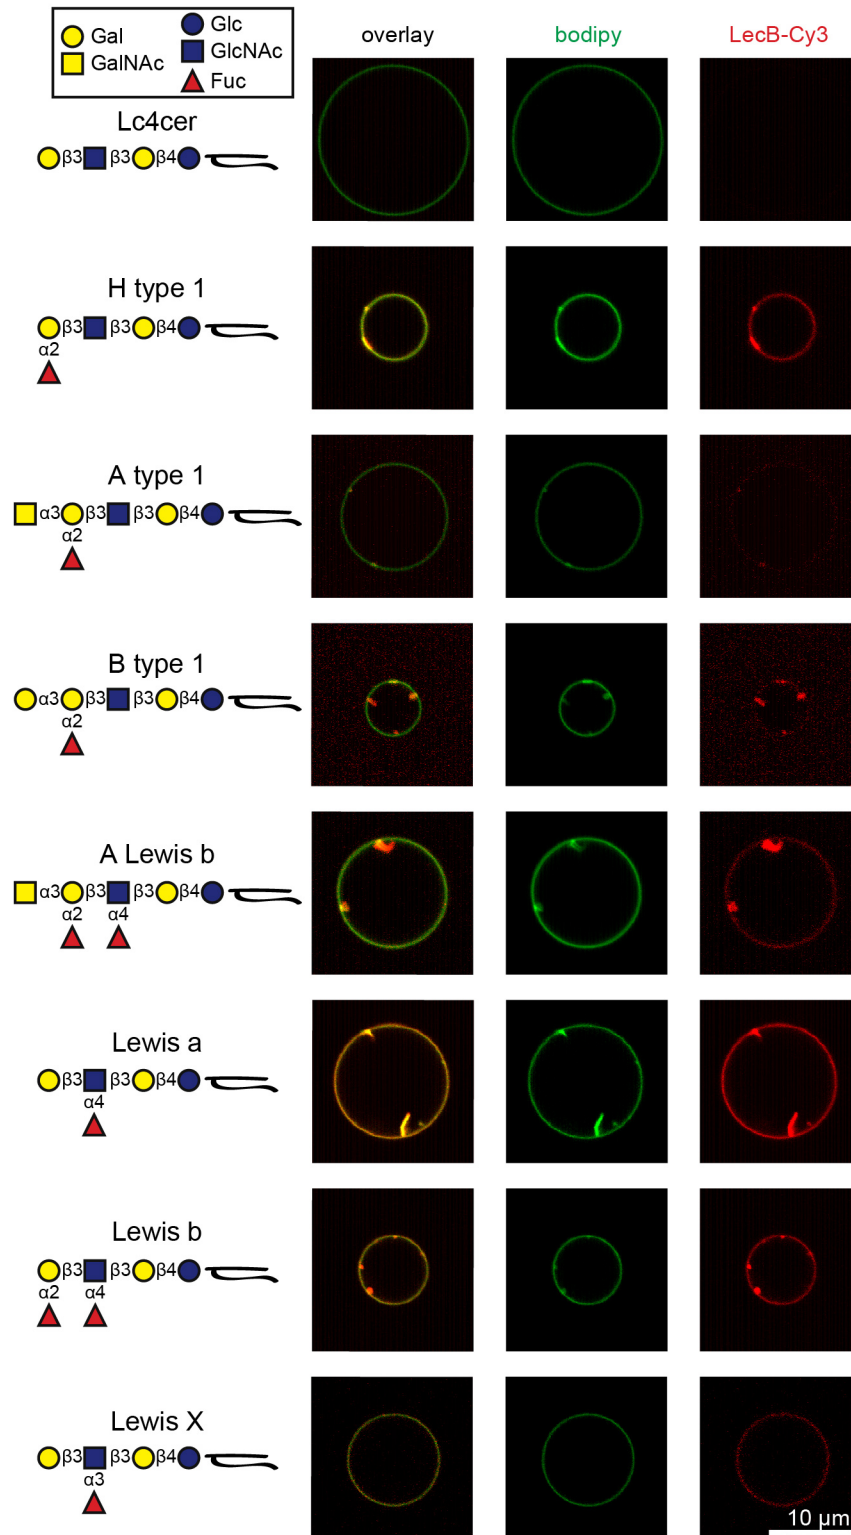

**Figure S3: Control experiments related to Fig. 4, part 1**

LecB-Cy3 (15  $\mu\text{g/ml}$ , red) was applied to GUVs containing BODIPY-FL-C5-HPC (bodipy; green) as a membrane marker and glycosphingolipids bearing antigens from the type 1 series (lactotetraosylceramide (Lc4cer; non-fucosylated precursor as negative control), H type 1, A type 1, B type 1, A Lewis b, Lewis a, or Lewis b) or the Lewis X antigen from the type 2 series. Schematic structures of the glycolipids are also depicted on the left. Confocal sections along equatorial planes of representative GUVs are displayed.
