# Supplementary material for: The Pseudomonas aeruginosa Lectin LecB Causes Integrin Internalization and Inhibits Epithelial Wound Healing
Source: PubMed Central journal article supplement (PMC7064779; doi:10.1128/mbio.03260-19), 2020-03-10
Supplement: mBio.03260-19-sf004.pdf [file mBio.03260-19-sf004.pdf]

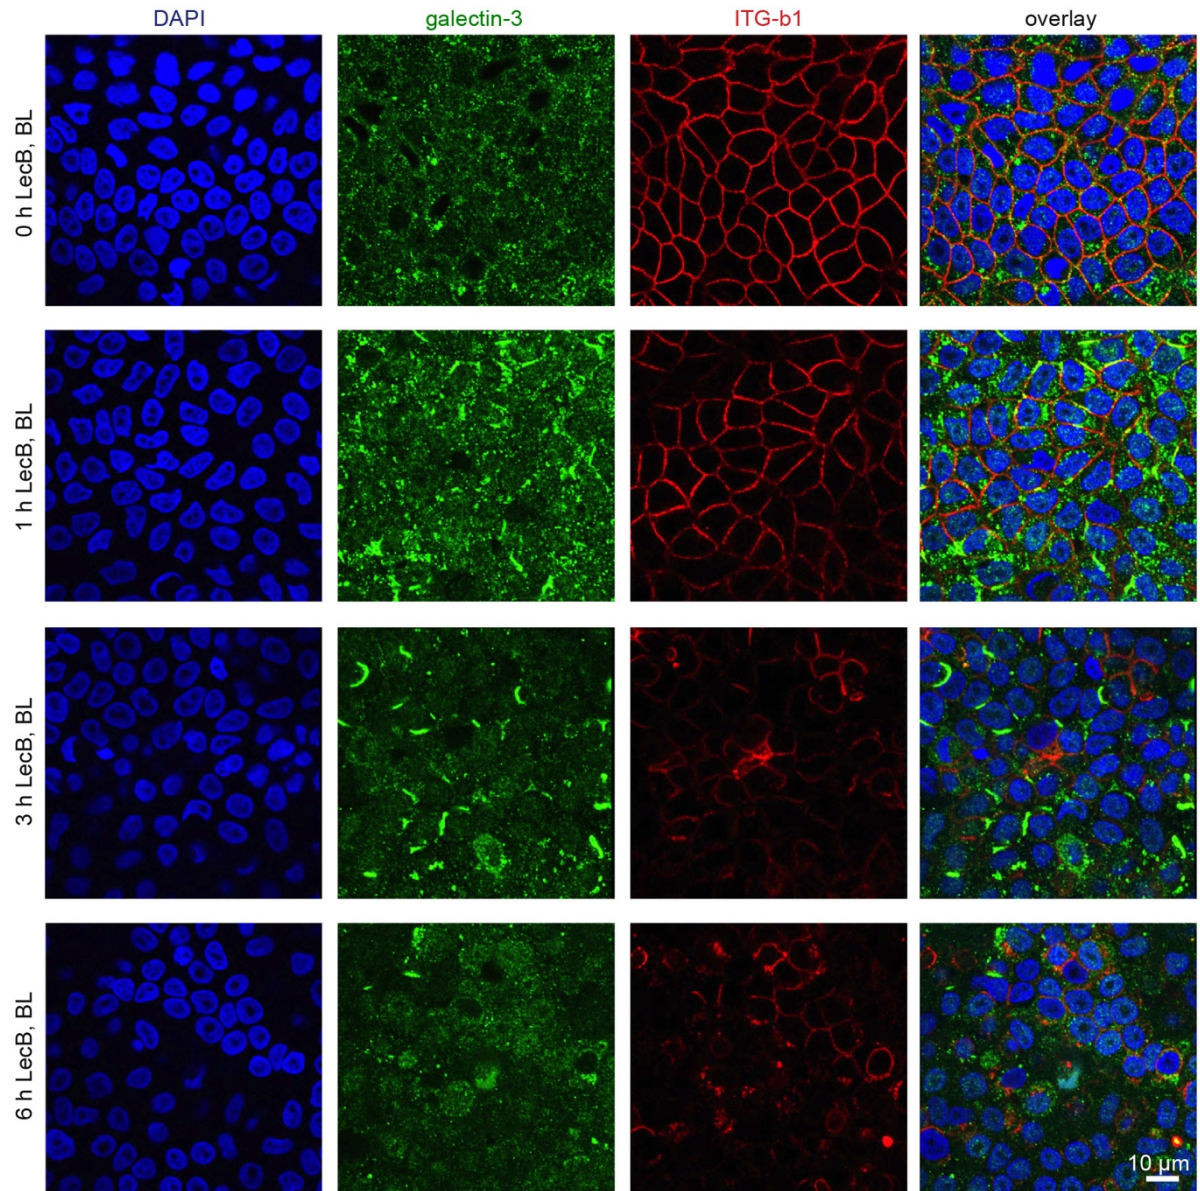

**Figure S4: Control experiments related to Fig. 4, part 2**

LecB was applied basolaterally to polarized MDCK cells grown on transwell filters. After fixation, endogenous galectin-3 (green),  $\beta$ 1-integrin (red), and nuclei (blue) were stained. Representative confocal sections (x-y sections) from a z-level 3  $\mu$ m above the transwell filter surface are displayed.
