# Supplementary material for: The Pseudomonas aeruginosa Lectin LecB Causes Integrin Internalization and Inhibits Epithelial Wound Healing
Source: PubMed Central journal article supplement (PMC7064779; doi:10.1128/mbio.03260-19), 2020-03-10
Supplement: mBio.03260-19-st001.pdf [file mBio.03260-19-st001.pdf]

**Table S1: List of basolateral LecB interaction partners identified by SILAC MS**

| #  | Protein IDs                                                                                      | Gene name               | Number of proteins | Peptides | PEP       | log2 (baso vs ctrl) 01 | log2 (baso vs ctrl) 02 |
|----|--------------------------------------------------------------------------------------------------|-------------------------|--------------------|----------|-----------|------------------------|------------------------|
| 1  | E2QSC8                                                                                           | TSPAN8                  | 1                  | 2        | 1,67E-29  | 6,61                   | 5,86                   |
| 2  | F1PP33;J9NUT8                                                                                    | ITGA1                   | 2                  | 12       | 1,38E-73  | 5,97                   | 3,14                   |
| 3  | F1PR26;J9NW82                                                                                    | PTGFRN                  | 2                  | 36       | 7,14E-133 | 5,82                   | 4,86                   |
| 4  | E2RBL9                                                                                           | ITGB6                   | 1                  | 12       | 2,41E-46  | 5,74                   | 4,82                   |
| 5  | E2QZT4                                                                                           | BSG                     | 1                  | 11       | 2,74E-37  | 5,52                   | 5,14                   |
| 6  | E2RT60                                                                                           | ITGB1                   | 1                  | 18       | 1,23E-132 | 5,47                   | 6,33                   |
| 7  | J9PB47;A1YV64                                                                                    | CAECAM1;<br>CEACAM28    | 2                  | 4        | 9,72E-38  | 5,36                   | 4,52                   |
| 8  | O97702;F1PPG5                                                                                    | GP1IIa;ITGB3            | 2                  | 13       | 6,15E-74  | 5,24                   | 5,18                   |
| 9  | F1PF03;E2RH87                                                                                    | EGFR                    | 2                  | 16       | 4,79E-76  | 5,22                   | 2,85                   |
| 10 | E2QX93                                                                                           | PCDH1                   | 1                  | 13       | 8,09E-60  | 5,21                   | 3,72                   |
| 11 | J9P3V6;F1PWJ7                                                                                    | BCAM                    | 2                  | 20       | 4,82E-239 | 5,21                   | 5,26                   |
| 12 | F1PRC5                                                                                           | SLC3A2                  | 1                  | 16       | 2,43E-64  | 5,09                   | 3,91                   |
| 13 | B6V8E6                                                                                           | CTNNB1                  | 1                  | 15       | 1,43E-82  | 4,98                   | 2,99                   |
| 14 | F1P9W5;E2RRI1                                                                                    | SLC12A2                 | 2                  | 25       | 1,39E-121 | 4,95                   | 4,64                   |
| 15 | F1P8Q0                                                                                           | ITGAV                   | 1                  | 33       | 1,48E-213 | 4,88                   | 3,72                   |
| 16 | F1PUP2;F1PUN5;<br>F1PTF5;F1PTF3;<br>F1PTF2                                                       | PTPRM                   | 5                  | 12       | 1,19E-41  | 4,80                   | 2,26                   |
| 17 | P33724;P33724-2;<br>F1PWG1                                                                       | CAV1                    | 3                  | 3        | 1,89E-15  | 4,74                   | 4,61                   |
| 18 | F1PGD5                                                                                           | LY75                    | 1                  | 14       | 2,78E-52  | 4,73                   | 3,28                   |
| 19 | J9NZA9;F1PBA1;<br>P50997;F1P767;<br>F1PL53;F1PJF0;<br>P50996;F1PRH6;<br>J9NZ73;J9P483;<br>F1P8N4 | ATP1A1                  | 11                 | 36       | 0,00E+00  | 4,71                   | 5,06                   |
| 20 | E2R9S7;J9NXR7;<br>F1Q015;F1PG43                                                                  | CTNNA1                  | 4                  | 21       | 3,67E-233 | 4,70                   | 3,48                   |
| 21 | E2RL88;J9NVU0                                                                                    | ITGA6                   | 2                  | 26       | 2,35E-149 | 4,69                   | 2,99                   |
| 22 | E2RMT2;F1PHH3                                                                                    | PTK7                    | 2                  | 19       | 1,86E-112 | 4,68                   | 3,10                   |
| 23 | E2RFE1                                                                                           | ITGB4                   | 1                  | 17       | 8,20E-139 | 4,65                   | 3,48                   |
| 24 | J9NXR3                                                                                           | Uncharacterized protein | 1                  | 13       | 5,23E-63  | 4,58                   | 3,46                   |
| 25 | F1PTY0;J9PAF7                                                                                    | SLC4A7                  | 2                  | 5        | 1,53E-15  | 4,58                   | 2,50                   |
| 26 | F1PAA3                                                                                           | CDH3                    | 1                  | 9        | 3,27E-23  | 4,43                   | 4,60                   |
| 27 | P31637                                                                                           | SLC5A3                  | 1                  | 3        | 1,26E-11  | 4,41                   | 2,60                   |
| 28 | F1PAA4;F1PAA9                                                                                    | CDH1                    | 2                  | 14       | 9,61E-100 | 4,39                   | 4,55                   |
| 29 | E2R2V6                                                                                           | L1CAM                   | 1                  | 36       | 1,56E-222 | 4,38                   | 3,80                   |
| 30 | E2ROZ0;E2R858;<br>J9NXY3;E2R971                                                                  | CDH6                    | 4                  | 16       | 2,27E-49  | 4,37                   | 6,21                   |
| 31 | F1PV63                                                                                           | CDCP1                   | 1                  | 11       | 2,12E-51  | 4,30                   | 3,38                   |
| 32 | F1P9S5;J9NRH0;<br>J9PA53;E2QY27;<br>E2RDE1                                                       | PLXNB2                  | 5                  | 27       | 4,97E-140 | 4,24                   | 3,04                   |
| 33 | F1PXU6;J9NY09;<br>E2RPM8;E2R795                                                                  | IGF1R                   | 4                  | 26       | 5,53E-110 | 4,20                   | 4,24                   |

| #  | Protein IDs                                                                                      | Gene name | Number of proteins | Peptides | PEP       | log2 (baso vs ctrl) 01 | log2 (baso vs ctrl) 02 |
|----|--------------------------------------------------------------------------------------------------|-----------|--------------------|----------|-----------|------------------------|------------------------|
| 34 | E2REA9                                                                                           | ITGA2     | 1                  | 28       | 1,35E-257 | 4,14                   | 4,19                   |
| 35 | J9NTL4;F1PK94                                                                                    | CDH17     | 2                  | 16       | 9,47E-99  | 4,07                   | 3,42                   |
| 36 | J9P423;F1PTZ7;<br>Q28284                                                                         | CD44      | 3                  | 6        | 1,56E-18  | 3,99                   | 6,38                   |
| 37 | E2R4F0;J9P8K7                                                                                    | CELSR2    | 2                  | 19       | 1,29E-63  | 3,83                   | 2,50                   |
| 38 | Q9XSU4;F2Z4N5;<br>J9P7F5                                                                         | RPS11     | 3                  | 5        | 1,14E-09  | 3,81                   | 3,58                   |
| 39 | F1PU73                                                                                           | NCSTN     | 1                  | 6        | 1,11E-23  | 3,81                   | 4,38                   |
| 40 | Z4YHE9;Q75ZY9;<br>J9P743;F1PEM3;<br>J9NY14;F1PR52;<br>E2RSH8;F6XRA9                              | MET       | 8                  | 20       | 6,25E-84  | 3,80                   | 3,73                   |
| 41 | F1Q439                                                                                           | ITGA3     | 1                  | 13       | 3,28E-122 | 3,78                   | 5,75                   |
| 42 | E2RE80;E2RE81;<br>F1PH17;E2R6Z2                                                                  | PTPRF     | 4                  | 34       | 4,63E-134 | 3,75                   | 2,89                   |
| 43 | F1PWL4                                                                                           | PVRL2     | 1                  | 5        | 9,06E-24  | 3,71                   | 2,54                   |
| 44 | F1PGJ7;J9P5N9;<br>E2RNZ4                                                                         | DDR1      | 3                  | 12       | 2,07E-67  | 3,70                   | 4,70                   |
| 45 | F1PBI6                                                                                           | THBS1     | 1                  | 11       | 5,93E-43  | 3,67                   | 2,54                   |
| 46 | F1PRQ8;F1PAD6                                                                                    | EPHB4     | 2                  | 10       | 7,64E-53  | 3,62                   | 2,39                   |
| 47 | E2QXI6                                                                                           | TPBG      | 1                  | 5        | 1,45E-19  | 3,59                   | 3,32                   |
| 48 | F1PIQ9;O18735;<br>F1PQ05;F1PAC5;<br>J9P9R2;J9P025;<br>E2R7P5;F1P627;<br>E2RHY5;F1P626;<br>J9P9H9 | ERBB2     | 11                 | 17       | 9,55E-72  | 3,59                   | 4,80                   |
| 49 | F1Q1M9;F1PM51                                                                                    | EPCAM     | 2                  | 12       | 2,05E-75  | 3,49                   | 3,53                   |
| 50 | F1PFS1                                                                                           | STOM      | 1                  | 5        | 6,91E-32  | 3,28                   | 3,62                   |
| 51 | J9P897;F2Z4P3;<br>Q9XSU3                                                                         | RPL23     | 3                  | 4        | 2,21E-12  | 3,27                   | 3,29                   |
| 52 | P06583;J9P7J0;<br>F1PMF0                                                                         | ATP1B1    | 3                  | 8        | 3,27E-23  | 3,25                   | 4,54                   |
| 53 | F1PAF1;E2R7J5                                                                                    | EPHB2     | 2                  | 10       | 1,43E-62  | 3,19                   | 3,11                   |
| 54 | J9P798;J9P7C2;<br>J9NSL1;E2RPP2;<br>J9JHX3;E2RCJ1;<br>E2R443                                     | RPS15A    | 7                  | 5        | 6,47E-18  | 3,12                   | 2,22                   |
| 55 | F1PPI5                                                                                           | SLC1A5    | 1                  | 5        | 7,18E-40  | 2,88                   | 2,82                   |
| 56 | E2RH47                                                                                           | RPS3      | 1                  | 8        | 1,60E-55  | 2,85                   | 2,53                   |
| 57 | E2R9G7;E2QTG3                                                                                    | RPL11     | 2                  | 3        | 1,28E-50  | 2,70                   | 2,49                   |
| 58 | F1P9K1                                                                                           | IGSF3     | 1                  | 15       | 8,96E-73  | 2,63                   | 2,35                   |
| 59 | F1PVS7                                                                                           | PVR       | 1                  | 8        | 2,09E-27  | 2,50                   | 3,56                   |
| 60 | F1QOH9                                                                                           | SLC1A4    | 1                  | 4        | 1,18E-14  | 2,48                   | 2,83                   |
| 61 | P33729;F1PB95                                                                                    | ICAM1     | 2                  | 7        | 6,33E-27  | 2,44                   | 2,25                   |
| 62 | F1PRL5;E2RRG4                                                                                    | SLC25A5   | 2                  | 6        | 1,66E-22  | 2,27                   | 2,20                   |
| 63 | J9P5A2;F1PLY1                                                                                    | CELSR1    | 2                  | 10       | 2,83E-47  | 2,27                   | 2,85                   |
| 64 | E2R8R8                                                                                           | RPS9      | 1                  | 4        | 4,70E-11  | 2,18                   | 2,39                   |
| 65 | E2R149                                                                                           | RPL9      | 1                  | 5        | 9,36E-17  | 2,04                   | 2,91                   |
