# Supplementary material for: The Pseudomonas aeruginosa Lectin LecB Causes Integrin Internalization and Inhibits Epithelial Wound Healing
Source: PubMed Central journal article supplement (PMC7064779; doi:10.1128/mbio.03260-19), 2020-03-10
Supplement: mBio.03260-19-st002.pdf [file mBio.03260-19-st002.pdf]

**Table S2: Lists of used primary and secondary antibodies** (WB ... Western Blot, IF ... immunofluorescence, IP ... immunoprecipitation, surf. stain ... used for surface staining in live cells, milk ... milk used as blocking agent, methanol ... cell fixation with methanol)

*Primary antibodies:*

| <b>antibody target</b>                                                           | <b>generated in species</b> | <b>supplier</b>   | <b>product number</b> | <b>dilution (application)</b>             |
|----------------------------------------------------------------------------------|-----------------------------|-------------------|-----------------------|-------------------------------------------|
| $\alpha$ 3-integrin                                                              | mouse                       | BD Biosciences    | 611044                | 1:200 (IF, methanol);<br>1:1000 (WB)      |
| $\beta$ -actin                                                                   | mouse                       | Sigma Aldrich     | A5316                 | 1:1000 (WB)                               |
| $\beta$ -catenin                                                                 | rabbit                      | Abcam             | ab32572               | 1:250 (IF)                                |
| $\beta$ 1-integrin                                                               | mouse                       | Thermo Scientific | MA1-19105             | 1:200 (IF); 1:1000 (WB, milk)             |
| $\beta$ 1-integrin                                                               | goat                        | R&D Systems       | AF1778                | 1:100 (IF)                                |
| $\beta$ 1-integrin                                                               | mouse                       | Millipore         | MAB2000               | 1:200 (IF); 1:1000 (WB, milk); 1:200 (IP) |
| $\beta$ 1-integrin (4B4)                                                         | mouse                       | Beckman Coulter   | 6603113               | 1:100 (surf. stain)                       |
| $\beta$ 1-integrin (9EG7)                                                        | rat                         | BD Biosciences    | 550531                | 1:100 (surf. stain)                       |
| $\beta$ 1-integrin (mAB 13)                                                      | rat                         | BD Biosciences    | 552828                | 1:100 (surf. stain)                       |
| $\beta$ 1-integrin( A1IB2)                                                       | rat                         | Millipore         | MABT409               | 1:100 (surf. stain)                       |
| E-cadherin                                                                       | mouse                       | BD Biosciences    | 610182                | 1:200 (IF)                                |
| laminin (antibody detects $\beta$ 1 and $\gamma$ 1 of LM-511 in MDCK cells (37)) | rabbit                      | Sigma Aldrich     | L9393                 | 1:100 (IF)                                |
| Lamp1                                                                            | rabbit                      | Cell Signaling    | 9091                  | 1:100 (IF)                                |
| LecB                                                                             | rabbit                      | Eurogentec        | newly produced        | 1:1000 (WB)                               |
| Rab9                                                                             | rabbit                      | Cell Signaling    | 5118                  | 1:100 (IF)                                |
| ZO-1                                                                             | rat                         | Millipore         | MABT11                | 1:50 (IF)                                 |

*Secondary antibodies:*

| <b>antibody target</b> | <b>conjugation</b> | <b>supplier</b>        | <b>product number</b> | <b>dilution (application)</b> |
|------------------------|--------------------|------------------------|-----------------------|-------------------------------|
| anti-mouse             | HRP                | Cell Signaling         | 7076                  | 1:2000 (WB)                   |
| anti-mouse             | Alexa488           | Thermo Fisher          | A21202                | 1:200 (IF)                    |
| anti-mouse             | Cy3                | Jackson Immunoresearch | 715-166-1500          | 1:200 (IF)                    |
| anti-mouse             | Alexa647           | Thermo Fisher          | A21236                | 1:200 (IF)                    |
|                        |                    |                        |                       |                               |
| anti-rabbit            | HRP                | Cell Signaling         | 7074                  | 1:2000 (WB)                   |
| anti-rabbit            | Alexa488           | Thermo Fisher          | A21206                | 1:200 (IF)                    |
| anti-rabbit            | Cy3                | Jackson Immunoresearch | 711-166-152           | 1:200 (IF)                    |
| anti-rabbit            | Alexa647           | Thermo Fisher          | A21245                | 1:200 (IF)                    |
| anti-rat               | Alexa488           | Thermo Fisher          | A21208                | 1:200 (IF)                    |
| anti-rat               | Alexa647           | Thermo Fisher          | A21247                | 1:200 (IF)                    |
| anti-goat              | Alexa647           | Thermo Fisher          | A21447                | 1:200 (IF)                    |
